# Supplementary material for: Laccase–TEMPO as an Efficient System for Doxorubicin Removal from Wastewaters
Source: MDPI journal article supplement (doi:10.3390/ijerph19116645), 2022-05-29

# Laccase-TEMPO as an efficient system for doxorubicin removal from wastewaters

L.I. Jinga, M. Tudose, P. Ionita

## Supplementary Material

**Table S1.** Influence of time and concentrations of doxorubicin, TEMPO and laccase upon the % of removal of doxorubicin at pH 5

| laccase<br>and<br>TEMPO | doxorubicin |     |     |           |          |     |     |           |          |     |     |           |
|-------------------------|-------------|-----|-----|-----------|----------|-----|-----|-----------|----------|-----|-----|-----------|
|                         | 25 µg/mL    |     |     |           | 50 µg/mL |     |     |           | 75 µg/mL |     |     |           |
|                         | 2 h         | 4 h | 6 h | 24 h      | 2 h      | 4 h | 6 h | 24 h      | 2 h      | 4 h | 6 h | 24 h      |
| 5 µg/mL                 | 0           | 1   | 16  | <b>27</b> | 0        | 1   | 9   | <b>14</b> | 0        | 2   | 8   | <b>13</b> |
| 10 µg/mL                | 1           | 9   | 26  | <b>60</b> | 1        | 5   | 16  | <b>36</b> | 2        | 5   | 12  | <b>29</b> |
| 15 µg/mL                | 12          | 27  | 48  | <b>91</b> | 7        | 16  | 27  | <b>75</b> | 4        | 11  | 19  | <b>49</b> |
| 20 µg/mL                | 17          | 34  | 57  | <b>92</b> | 15       | 26  | 40  | <b>91</b> | 8        | 16  | 28  | <b>81</b> |
| 25 µg/mL                | 41          | 67  | 90  | <b>93</b> | 18       | 33  | 51  | <b>92</b> | 14       | 25  | 39  | <b>92</b> |

**Table S2.** Influence of time and concentrations of doxorubicin, TEMPO and laccase upon the % of removal of doxorubicin at pH 7

| laccase<br>and<br>TEMPO | doxorubicin |     |     |            |          |     |     |            |          |     |     |           |
|-------------------------|-------------|-----|-----|------------|----------|-----|-----|------------|----------|-----|-----|-----------|
|                         | 25 µg/mL    |     |     |            | 50 µg/mL |     |     |            | 75 µg/mL |     |     |           |
|                         | 2 h         | 4 h | 6 h | 24 h       | 2 h      | 4 h | 6 h | 24 h       | 2 h      | 4 h | 6 h | 24 h      |
| 5 µg/mL                 | 3           | 16  | 21  | <b>45</b>  | 1        | 11  | 15  | <b>24</b>  | 5        | 12  | 16  | <b>23</b> |
| 10 µg/mL                | 3           | 17  | 26  | <b>55</b>  | 2        | 7   | 19  | <b>35</b>  | 5        | 14  | 18  | <b>28</b> |
| 15 µg/mL                | 5           | 22  | 33  | <b>68</b>  | 5        | 12  | 22  | <b>56</b>  | 9        | 19  | 21  | <b>44</b> |
| 20 µg/mL                | 8           | 25  | 35  | <b>77</b>  | 7        | 18  | 27  | <b>72</b>  | 12       | 21  | 25  | <b>73</b> |
| 25 µg/mL                | 15          | 33  | 40  | <b>100</b> | 13       | 25  | 34  | <b>100</b> | 16       | 23  | 30  | <b>65</b> |

**Figure S1.** Calibration curve showing the correlation of the doxorubicin concentration with the values of the registered absorbance at 480 nm

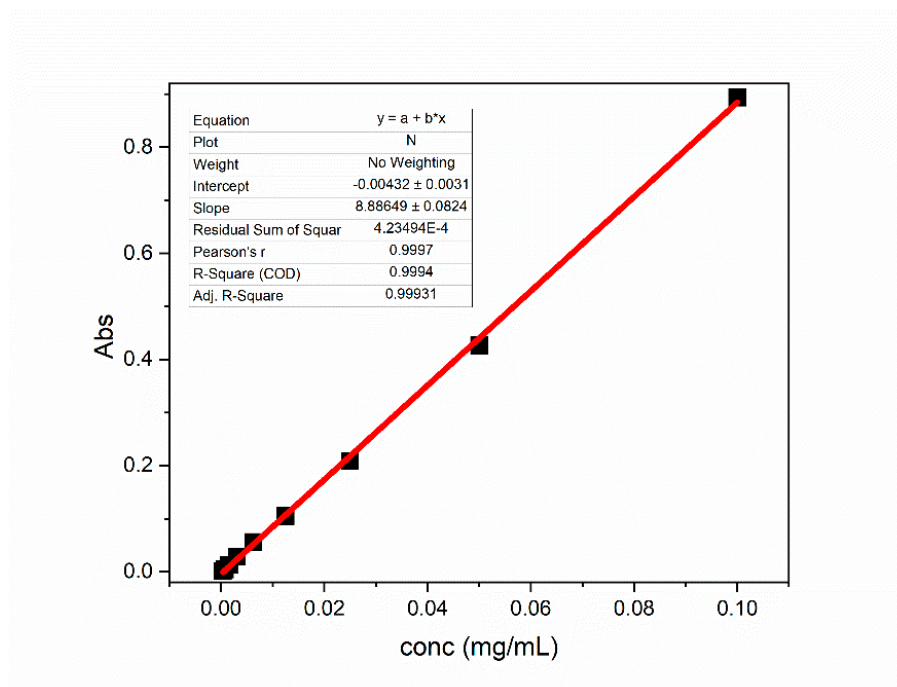

Supplement: s1 [file s1]
